# Supplementary material for: Improving the trustworthiness, usefulness, and ethics of biomedical research through an innovative and comprehensive institutional initiative
Source: PLoS Biol. 2020 Feb 11;18(2):e3000576. doi: 10.1371/journal.pbio.3000576 (PMC7012388; doi:10.1371/journal.pbio.3000576)
Supplement: S1 Authors — (DOCX) [file pbio.3000576.s001.docx]

QUEST Group:

Rene Bernard1,2, Merlin Bittlinger1,2, Evgeny Bobrov1, Meggie Danziger1,2, Ulrich Dirnagl1,2*****, Klaus-Detlef Heber1, Peter Grabitz1,2, Miriam Kip1, Corinna Klingler1,2, Holger Langhof1,2, Sarah K McCann1,2, Stephanie Müller-Ohlraun1, Elena Pavlenko1,2, Ingo Przesdzing1,2, Nico Riedel1, Bob Siegerink1,2, Daniel Strech1,2, Ulf Toelch1, Tracey Weissgerber1,2, Sarah Weschke1, Christiane Wetzel1,2

1 QUEST Center for Transforming Biomedical Research, Berlin Institute of Health (BIH), Berlin, Germany

2 Charité - Universitätsmedizin Berlin, Berlin, Germany
